# Supplementary material for: The Fairy Chemical Imidazole-4-carboxamide Inhibits the Expression of Axl, PD-L1, and PD-L2 and Improves Response to Cisplatin in Melanoma
Source: MDPI journal article supplement (doi:10.3390/cells11030374), 2022-01-22
Supplement: s1 [file s1]

# Supplementary Information

## **The fairy chemical imidazole-4-carboxamide inhibits the ex-pression of Axl, PD-L1, and PD-L2 and improves response to cisplatin in melanoma**

Chisa Inoue, Taro Yasuma, Corina N. D'Alessandro-Gabazza, Masaaki Toda, Valeria Fridman

D'Alessandro, Ryo Inoue, Hajime Fujimoto, Hajime Kobori, Suphachai Tharavecharak, Atsuro Takeshita,

Kota Nishihama, Yuko Okano, Jing Wu, Tetsu Kobayashi, Yutaka Yano, Hirokazu Kawagishi, and Esteban

C. Gabazza.

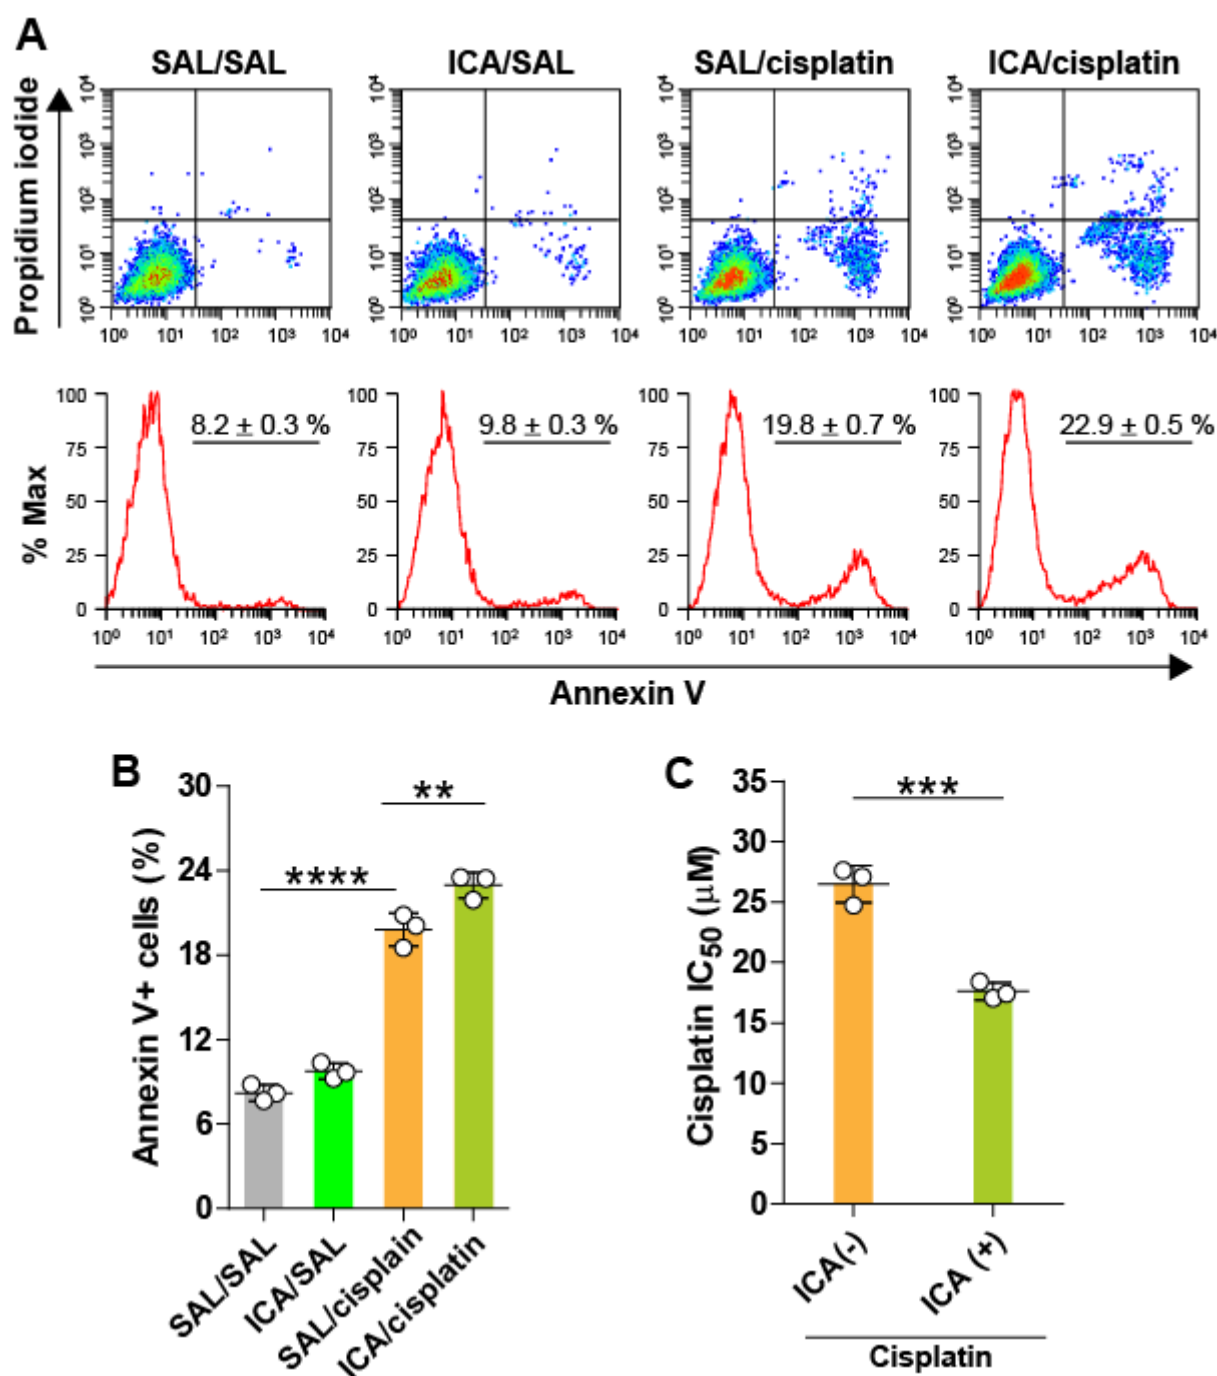

**Supplementary Figure S1. ICA potentiates cisplatin activity. (A, B):** B16F10 melanoma cells cultured in the presence of saline, ICA plus saline, cisplatin plus saline, or ICA plus cisplatin and apoptosis was evaluated by flow cytometry. **(C):** The 3-(4,5-dimethylthiazol-2-yl)-2,5-diphenyl-2H-tetrazolium bromide (MTT) assay to calculate the cisplatin IC<sub>50</sub> was performed using a commercial kit. Data are expressed as the mean  $\pm$  S.D.  $n=3$  in each treatment group. Statistical analysis was performed by ANOVA with Fisher's predicted least significant difference test. \*\* $p<0.01$ ; \*\*\* $p<0.001$ ; \*\*\*\* $p<0.0001$ . ICA, imidazole-4-carboxamide; SAL, saline.

**Supplementary Table S1. Antibodies used for Western blotting and flow cytometry analysis**

| Target             | Application | Species reactivity | Manufacturers                                     | Catalogue No | Host species & isotype          |
|--------------------|-------------|--------------------|---------------------------------------------------|--------------|---------------------------------|
| AXL                | WB          | human              | Cell Signaling (Danvers, MA, USA)                 | #8661        | Rabbit monoclonal antibody      |
| AXL                | WB          | mouse              | R&D System (Minneapolis, MN, USA)                 | MAB8541      | Rat monoclonal antibody (IgG2a) |
| PD-L1              | WB          | human, mouse       | Proteintech (Rosemont, IL, USA)                   | 179521-1-AP  | Rabbit polyclonal antibody      |
| PD-L2              | WB          | human, mouse       | Proteintech (Rosemont, IL, USA)                   | 18251-1-AP   | Rabbit polyclonal antibody      |
| AXL                | FC          | mouse              | R&D System (Minneapolis, MN, USA)                 | FAB8541-R    | Rat monoclonal antibody (IgG2a) |
| PD-L1              | FC          | mouse              | BioLegend ( San Diego, CA, USA)                   | 155404       | Rat monoclonal antibody (IgG2a) |
| PD-L2              | FC          | mouse              | BioLegend ( San Diego, CA, USA)                   | 107205       | Rat monoclonal antibody (IgG2a) |
| Phosphatidylserine | FC          |                    | FITC-Annexin V, BioLegend ( San Diego, CA, USA)   | 640906       |                                 |
| DNA                | FC          |                    | Propidium iodide, BioLegend ( San Diego, CA, USA) | 556463       |                                 |

PD-L1, programmed death-ligand 1; PD-L2, programmed death-ligand 2; WB, Western blotting; FC, flow cytometry; FITC, fluorescein isothiocyanate.
